# Supplementary material
Source: publisher figshare collection journal article supplement (https://sage.figshare.com/ndownloader/files/13992608)
Supplement: Supplementary file 1 [file 13992608]

### Supplementary material 1: Read (CTV3) codes for autism

| Read (CTV3) code | Read (CTV3) code description            | Number of times recorded in GP data extract for cohort |
|------------------|-----------------------------------------|--------------------------------------------------------|
| X00TM            | Autistic spectrum disorder              | 102                                                    |
| XE2v2            | Childhood autism                        | 49                                                     |
| XabEY            | Under care of autism assessment service | 5                                                      |
| X00TN            | Atypical autism                         | 4                                                      |
| E1400            | Active infantile autism                 | 3                                                      |
| X00TP            | Asperger syndrome                       | 1                                                      |

164 Read codes identified for 128 children. Some children have more than one Read code (for example, all those recorded as “under the care of autism assessment service” had a code for “Autism spectrum disorder” or “Childhood autism”).

## Supplementary material 2: Child age at autism diagnosis and cumulative prevalence rate by age group

### 2a: Age of child at GP data extract and age of diagnosis of autism

| Age at GP extract | Age of child first autism recorded in GP records |           |           |           |           |          |          | Total      |
|-------------------|--------------------------------------------------|-----------|-----------|-----------|-----------|----------|----------|------------|
|                   | Two                                              | Three     | Four      | Five      | Six       | Seven    | Eight    |            |
| Five              | 0                                                | 10        | 6         | 6         |           |          |          | <b>22</b>  |
| Six               | 1                                                | 7         | 14        | 11        | 4         |          |          | <b>37</b>  |
| Seven             | 2                                                | 3         | 11        | 12        | 2         | 3        |          | <b>33</b>  |
| Eight             | 0                                                | 7         | 4         | 6         | 4         | 5        | 4        | <b>30</b>  |
| Nine              | 0                                                | 1         | 1         | 3         | 0         | 1        | 0        | <b>6</b>   |
| <b>Total</b>      | <b>3</b>                                         | <b>28</b> | <b>36</b> | <b>38</b> | <b>10</b> | <b>9</b> | <b>4</b> | <b>128</b> |

### 2b: Cumulative prevalence rates (per hundred children)

| Age at GP extract           | Two   | Three | Four  | Five  | Six   | Seven | Eight |
|-----------------------------|-------|-------|-------|-------|-------|-------|-------|
| Five/ Six<br>(n = 5,550)    | 0.018 | 0.324 | 0.685 | 0.991 | 1.063 |       |       |
| Seven/ Eight<br>(n = 6,878) | 0.029 | 0.189 | 0.422 | 0.727 | 0.814 | 0.945 | 1.003 |
